# Supplementary material for: Facile fabrication of a Janus mesh for water fluid unidirectional transportation
Source: Royal Society of Chemistry journal article supplement (doi:10.1039/d0ra08632k), 2021-01-01
Supplement: d0ra08632k2.pdf [file d0ra08632k2.pdf]

**Facile Fabrication of Janus mesh for Water Fluid Unidirectional  
Transportation**

*Ziqi Li, Weitao Liang\*, Weiping Li, Ze Wang, Liqun Zhu, Haining Chen,  
Huicong Liu\**

Key Laboratory of Aerospace Materials and Performance (Ministry of  
Education), School of Materials Science and Engineering, Beihang  
University, Beijing 100191, China

\*E-mail address: [lwt@buaa.edu.cn](mailto:lwt@buaa.edu.cn), [liuhc@buaa.edu.cn](mailto:liuhc@buaa.edu.cn)

Tel: +86 1082317113. Fax: +86 1082317113.

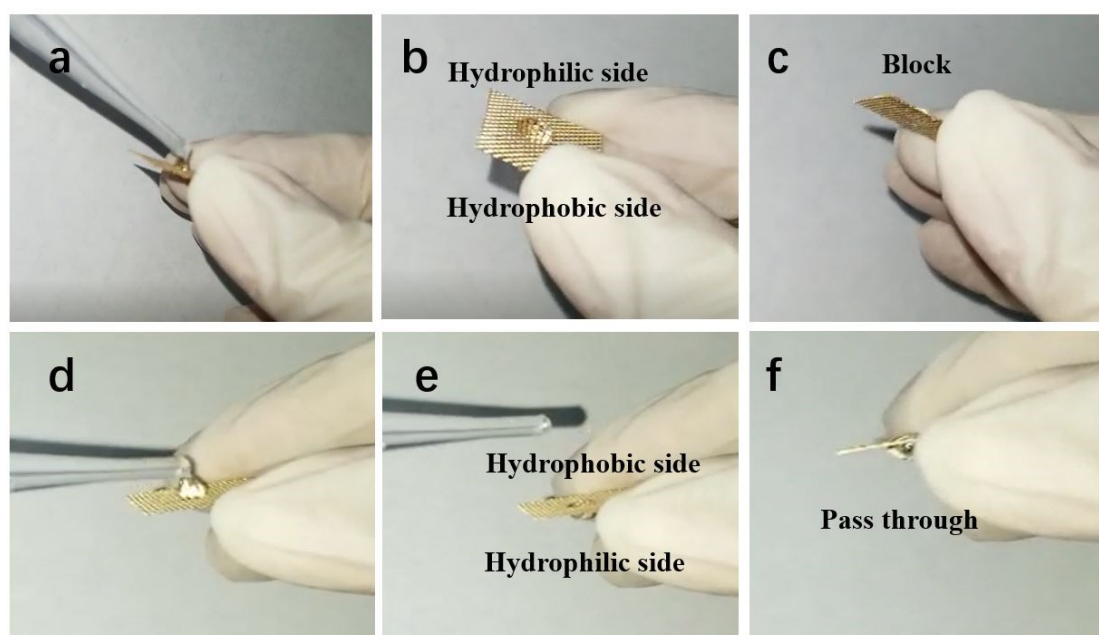

**Figure S1** Digital photos of prepared Janus mesh and its unidirectional passing/blocking property for a water droplet in air.

**Table S1.** Water contact angles of the prepared mesh with different mesh numbers.

| <b>Mesh number</b> | <b>Hydrophilic mesh</b> | <b>Hydrophobic mesh</b> |
|--------------------|-------------------------|-------------------------|
| 50                 | $<10^\circ$             | $100\pm 0.5^\circ$      |
| 100                | $<10^\circ$             | $145\pm 0.2^\circ$      |
| 200                | $<10^\circ$             | $162\pm 0.4^\circ$      |
| 300                | $30\pm 0.6^\circ$       | $162\pm 0.4^\circ$      |

**Video S1** Video of water fluid flow from hydrophilic side to hydrophobic side.

**Video S2** Video of water fluid flow from hydrophobic side to hydrophilic side.
